# Supplementary material
Source: PubMed Central journal article supplement (PMC9133142)
Supplement: NIHMS1786146-supplement-1.pdf [file NIHMS1786146-supplement-1.pdf]

## SUPPLEMENTAL INFORMATION

### **Resurfaced ZIKV EDIII nanoparticle immunogens elicit immune-focused protective responses *in vivo***

George I. Georgiev<sup>1</sup>, Ryan J. Malonis<sup>1</sup>, Ariel S. Wirchnianski<sup>1,2</sup>, Alex W. Wessel<sup>3</sup>, Helen S. Jung<sup>1</sup>, Sean M. Cahill<sup>1</sup>, Elisabeth K. Nyakatura<sup>1,6</sup>, Olivia Vergnolle<sup>1,6</sup>, Kimberly A. Dowd<sup>7</sup>, David Cowburn<sup>1</sup>, Theodore C. Pierson<sup>7</sup>, Michael S. Diamond<sup>3,4,5</sup>, Jonathan R. Lai<sup>1,8,\*</sup>

<sup>1</sup>Department of Biochemistry, New York, NY 10461, USA

<sup>2</sup>Department of Microbiology and Immunology, Albert Einstein College of Medicine, New York, NY 10461, USA

<sup>3</sup>Department of Medicine, Washington University in St. Louis, School of Medicine, St. Louis, MO 63110, USA

<sup>4</sup>Department of Molecular Microbiology, Washington University in St. Louis, School of Medicine, St. Louis, MO 63110, USA

<sup>5</sup>Department of Pathology & Immunology, Washington University in St. Louis, School of Medicine, St. Louis, MO 63110, USA

<sup>6</sup>Present address: Tri-Institutional Therapeutics Discovery Institute, New York, NY 10021, USA

<sup>7</sup>Viral Pathogenesis Section, National Institute of Allergy and Infectious Diseases, National Institutes of Health, Bethesda, MD 20892, USA

<sup>8</sup>Lead Contact

\*Correspondence: [jon.lai@einsteinmed.edu](mailto:jon.lai@einsteinmed.edu)

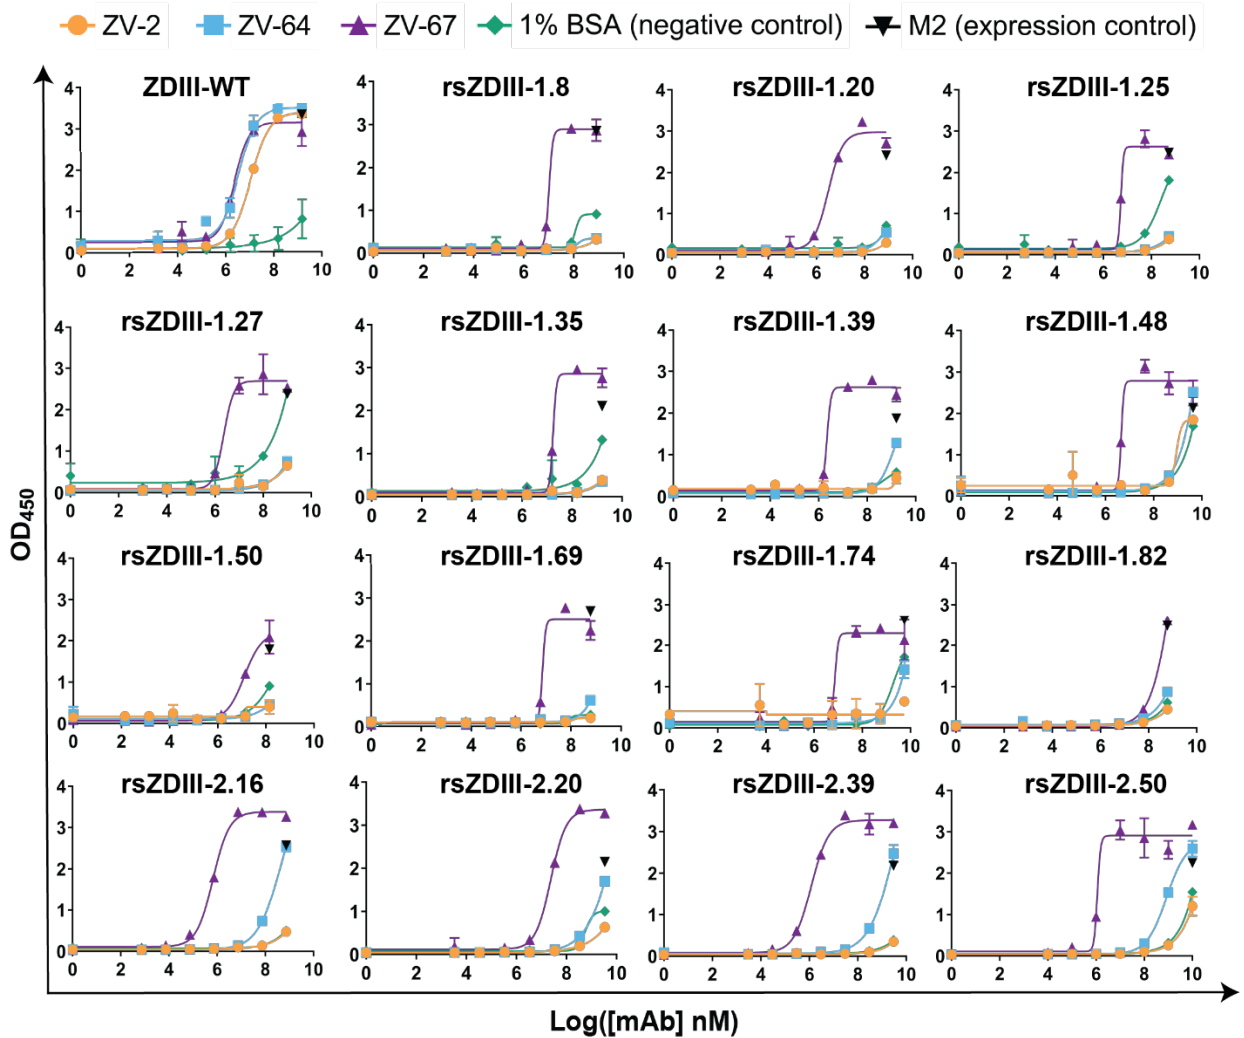

**Figure S1, related to Figure 1.** rsZDIII phage clone reactivity toward ZV-mAbs (ZV-2, ZV-64, and ZV-67) determined by ELISA. Data from a single experiment completed in duplicate are plotted as (mean OD<sub>450</sub>) ± SD.

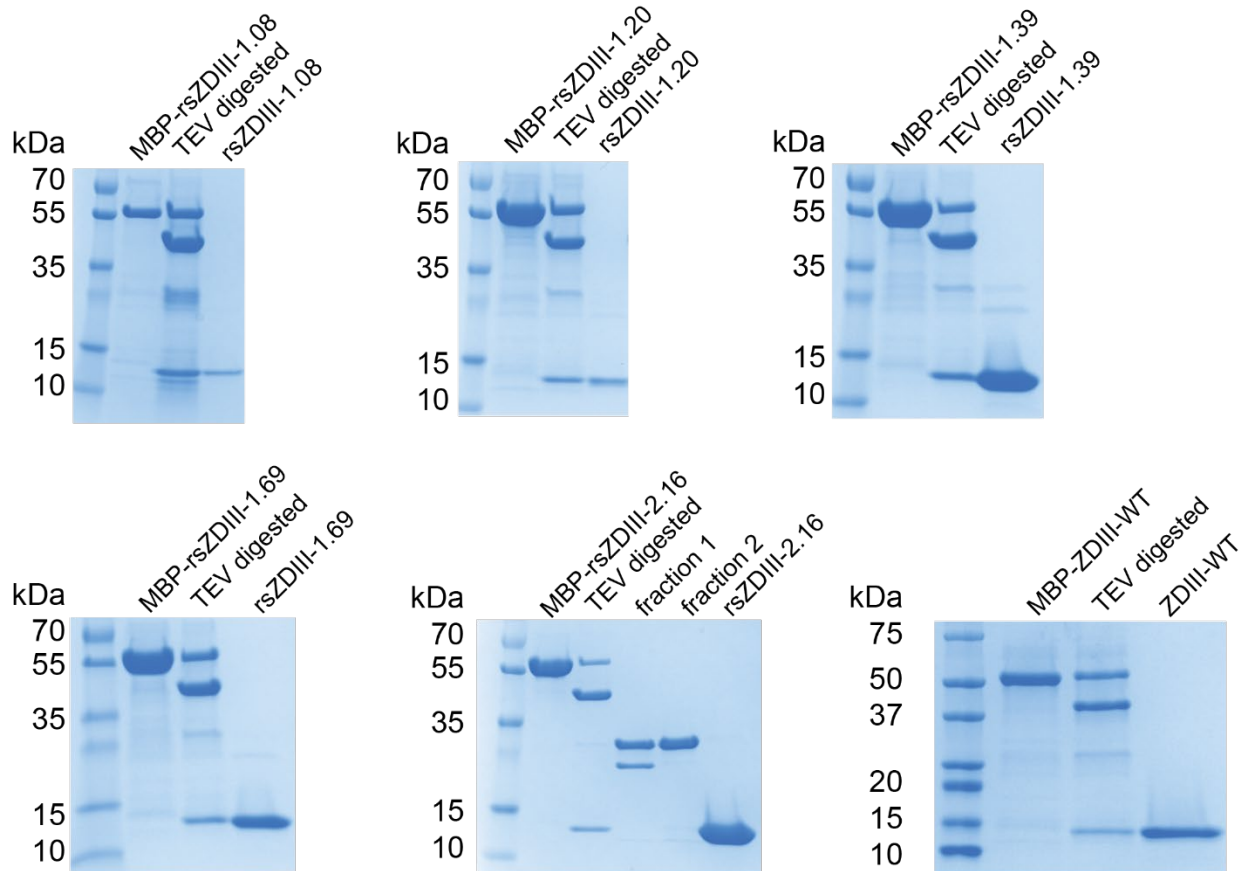

**Figure S2, related to Figure 2.** Coomassie blue-stained gels for recombinant expressed rsZDIII variants following TEV cleavage of MBP-rsZDIII fusion proteins and purification by anion exchange chromatography.

**A**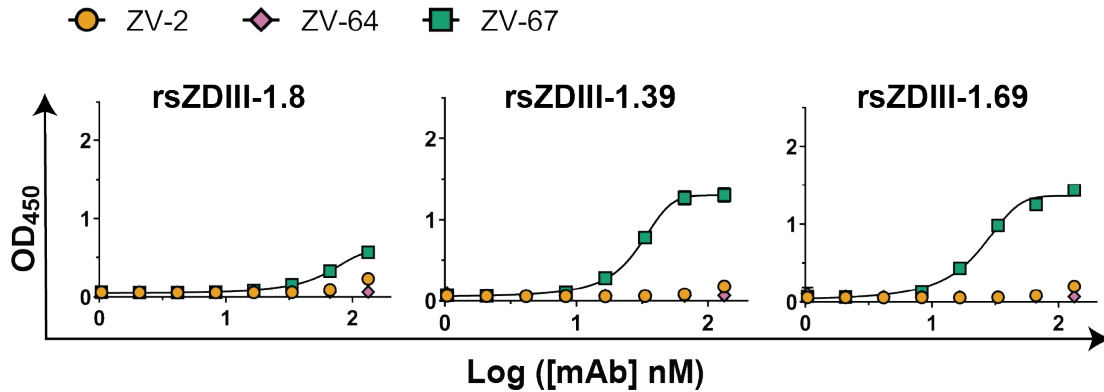**B**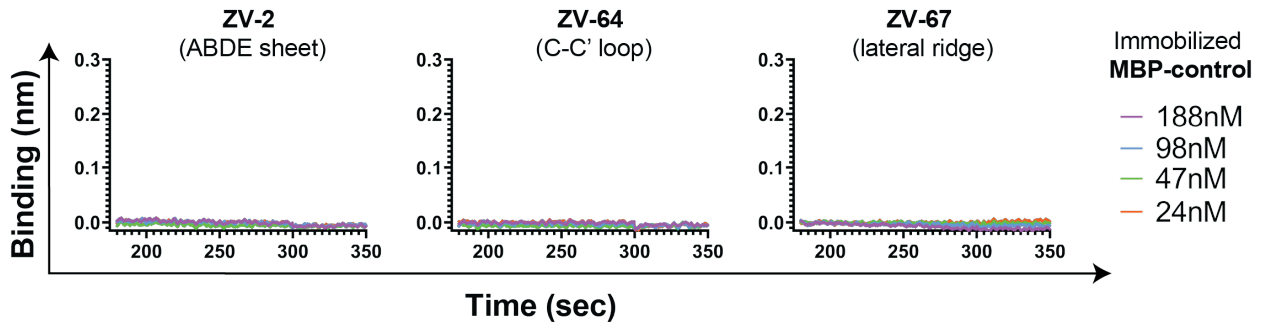

**Figure S3, related to Figure 2 and STAR methods. Biochemical characterization of rsZDIII variants.** (A) Binding reactivity of ZV-mAbs (ZV-2, ZV-64, and ZV-67) to soluble rsZDIII variants determined by ELISA. Representative data from two independent experiments completed in triplicate are plotted as the (mean OD<sub>450</sub>) ± SD. (B) Binding interactions between MBP and ZV-mAbs (ZV-2, ZV-64, and ZV-67) by BLI. Representative data from two independent experiments is shown.

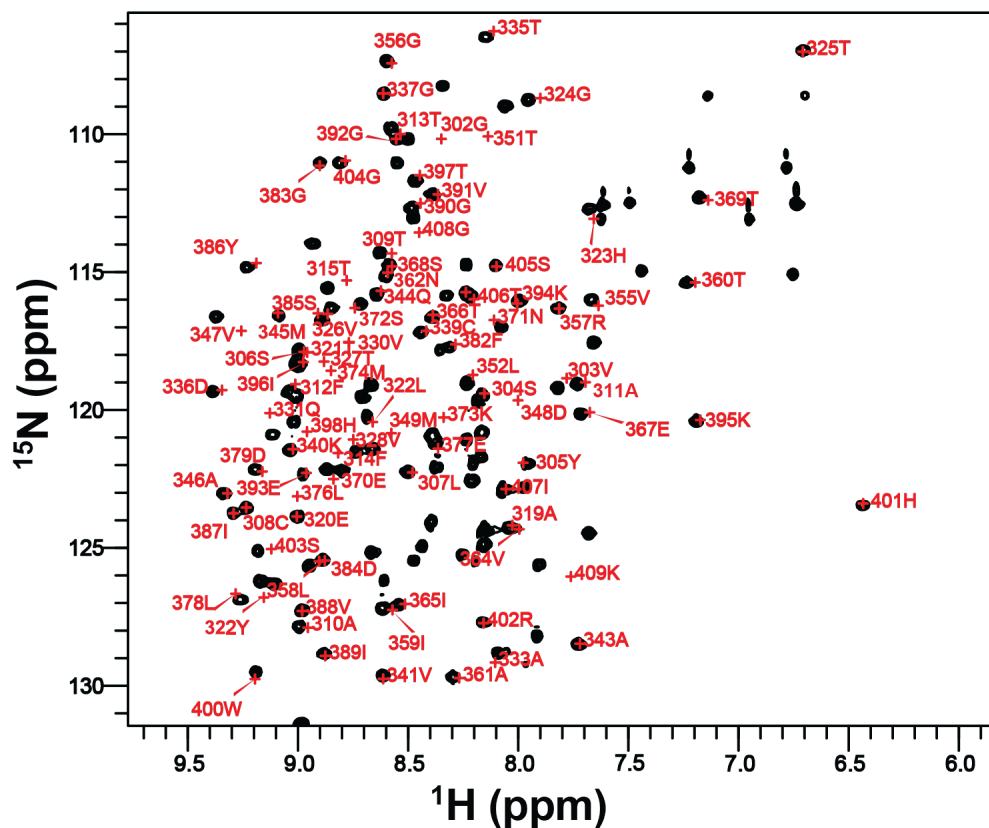

**Figure S4**, related to **Figure 3**. HSQC spectrum of rsZDIII-2.39 (shown in black contours) and the ZDIII-WT (BMRB 34167, shown as red crosses). Spectra shown was acquired from a single labelled protein preparation.

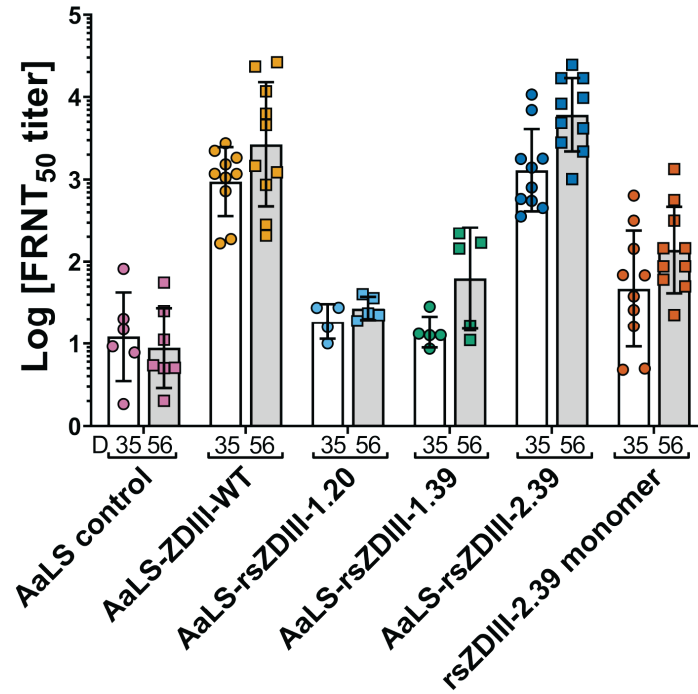

**Figure S5, related to Figure 4.** FRNT<sub>50</sub> neutralization titers of D35 and D56 serum collected from immunized mice. Data from two independent experiments, completed in triplicate, are plotted as (mean FRNT<sub>50</sub>)  $\pm$  SD.

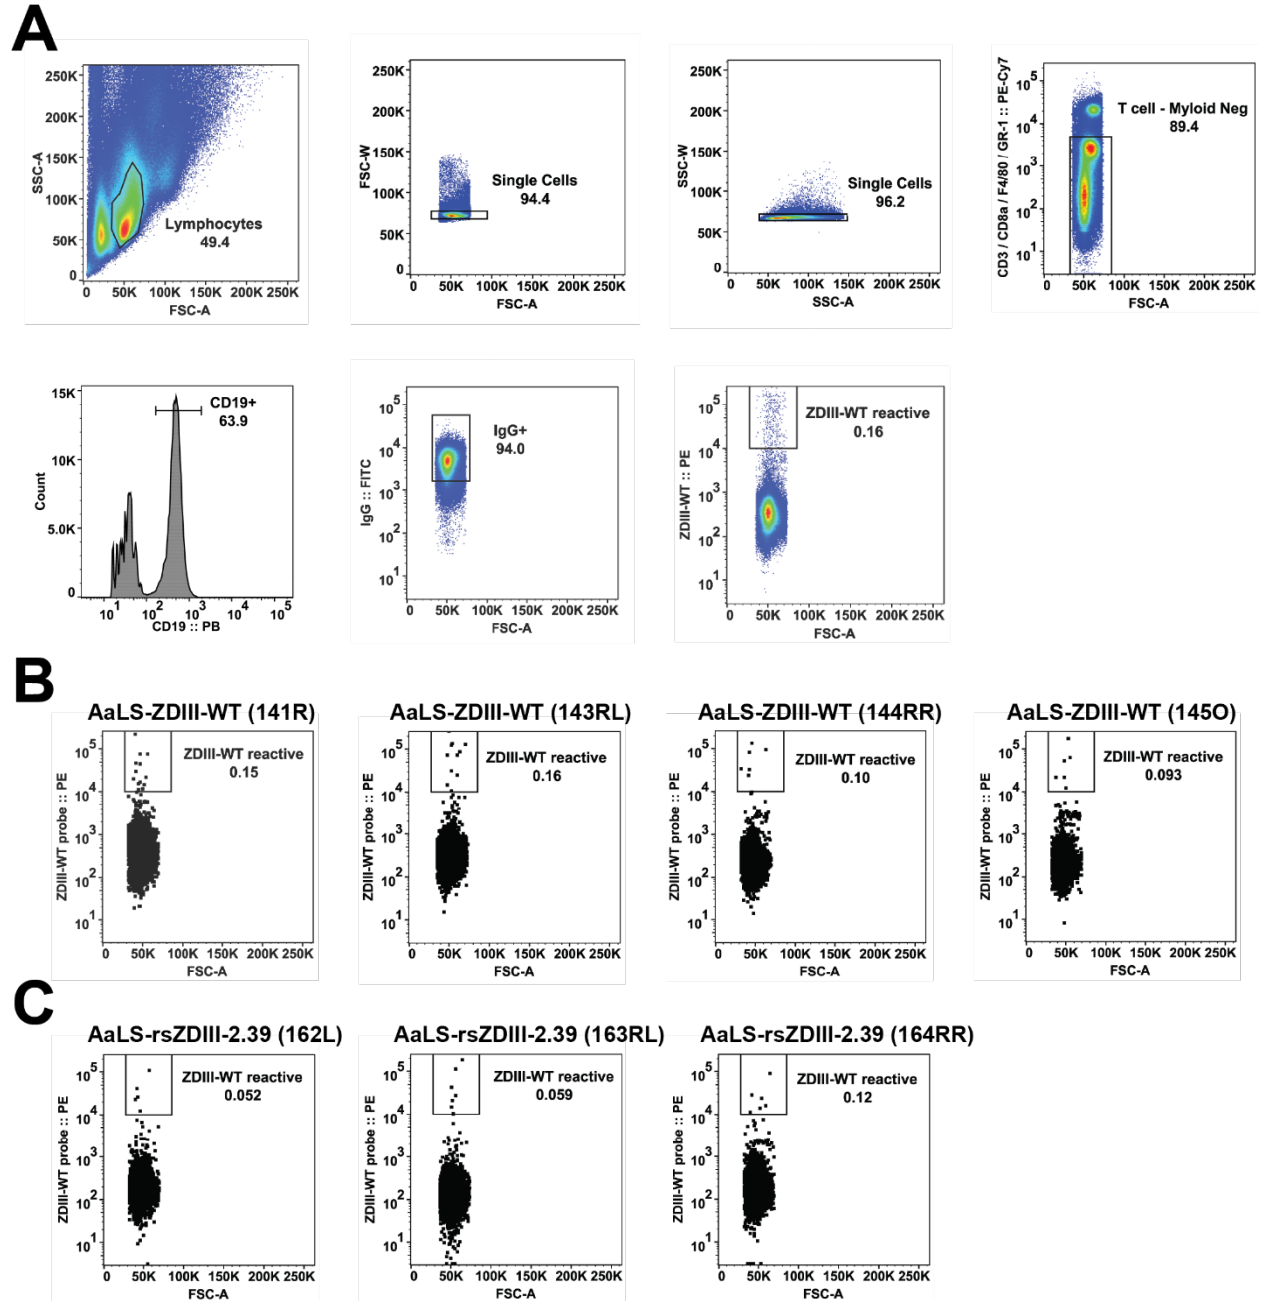

**Figure S6, related to Figure 6. Flow cytometry analysis of the frequency of ZDIII-WT antigen-reactive CD19+ / IgG+ splenic B cells in vaccinated animals.**

(A) Gating strategy used for analysis. (B) ZDIII-WT reactive B cells in AaLS-ZDIII-WT immunized animals collected at D56, each plot represents an independent biological sample and experiment. (C) Frequencies of ZDIII-WT reactive B cells in AaLS-rsZDIII-2.39 immunized animals collected at D56, each dot plot represents an independent biological sample and experiment.

**Table S1, related to Figure 1 and Star Methods.** Amino acid sequences of proteins and peptides described in this study.

| Protein/ peptide | Amino acid sequence                                                                                                                                                                                                                                                                                   |
|------------------|-------------------------------------------------------------------------------------------------------------------------------------------------------------------------------------------------------------------------------------------------------------------------------------------------------|
| SpyTag (SpT)     | MAHIVMVDAYKPTK                                                                                                                                                                                                                                                                                        |
| SpyCatcher (SpC) | GAMVDTLSGLSSEQGQSGDMTIEEDSATHIKFSKRDEDGKELAGATMELRDSSGKTISTWIS<br>DGQVKDFLYPGKYTFVETAAPDGYEVATAITFTVNEQQQVTVNGKATKGAHI                                                                                                                                                                                |
| ZDIII-WT-SpT     | GVSYSLCTAAFTFTKIPAETLHGTVTVEVQYAGTDGPCKVPAQMAVDMQTLTPVGRITANPVI<br>TESTENSKMMELEDPFPGDSYIVIGVGEKKITHHWHRSGSTIGKSGSMAHIVMVDAYKPTK                                                                                                                                                                      |
| AaLS-SpC         | MQIYEGKLTAEGLRFGIVASRFNHALVDRLVEGAIDCIVRHGGREEDITLVRVPGSWEIPVAAG<br>ELARKEDIDAVIAIGVLIRGATPHFDYIASEVSKGLANLSLELRKPITFGVITADTLEQAIERAGTK<br>HGNKGWEAALSIAIEMANLFKSLRSGGGSGGGGAMVDTLSGLSSEQGQSGDMTIEEDSATHI<br>KFSKRDEDGKELAGATMELRDSSGKTISTWISDGQVKDFLYPGKYTFVETAAPDGYEVATAI<br>TFTVNEQQQVTVNGKATKGAHI |



**Table S2, related to Figure 3.** Chemical shift perturbation (CSP) values for assigned residues in rsZDIII-2.39 compared to ZDIII-WT (5OMZ; BMRB 34167).

| <b>Position</b> | <b>Residue</b> | <b>H</b> | <b>NH</b> | <b><math>\Delta</math>H</b> | <b><math>\Delta</math>NH</b> | <b>CSP</b> |
|-----------------|----------------|----------|-----------|-----------------------------|------------------------------|------------|
| 303             | Val            | 7.82     | 119.2     | -0.04                       | -0.35                        | 0.081      |
| 304             | Ser            | 8.18     | 119.66    | -0.03                       | -0.26                        | 0.060      |
| 305             | Tyr            | 7.96     | 121.94    | 0.02                        | -0.03                        | 0.021      |
| 307             | Leu            | 8.5      | 122.25    | -0.02                       | 0.02                         | 0.020      |
| 308             | Cys            | 9.24     | 123.54    | -0.01                       | 0                            | 0.010      |
| 309             | Thr            | 8.63     | 114.3     | -0.06                       | 0.02                         | 0.060      |
| 310             | Ala            | 8.99     | 127.84    | -0.03                       | 0.05                         | 0.032      |
| 311             | Ala            | 7.73     | 119.05    | -0.03                       | -0.06                        | 0.032      |
| 312             | Phe            | 9.03     | 119.32    | -0.02                       | -0.26                        | 0.056      |
| 313             | Thr            | 8.58     | 109.77    | -0.04                       | 0.22                         | 0.059      |
| 314             | Phe            | 8.74     | 121.51    | 0.08                        | 0.05                         | 0.081      |
| 315             | Thr            | 8.87     | 115.58    | -0.09                       | -0.28                        | 0.106      |
| 320             | Glu            | 9        | 123.84    | 0.01                        | 0.02                         | 0.011      |
| 323             | His            | 7.68     | 112.72    | -0.02                       | 0.35                         | 0.073      |
| 324             | Gly            | 7.96     | 108.75    | -0.06                       | -0.06                        | 0.061      |
| 325             | Thr            | 6.7      | 106.95    | 0.01                        | 0.06                         | 0.016      |
| 326             | Val            | 8.89     | 116.76    | -0.02                       | -0.24                        | 0.052      |
| 328             | Val            | 8.67     | 121.4     | 0.08                        | -0.33                        | 0.104      |
| 331             | Gln            | 9.12     | 120.9     | 0.01                        | -0.79                        | 0.158      |
| 332             | Tyr            | 9.17     | 126.18    | -0.02                       | 0.62                         | 0.126      |
| 333             | Ala            | 8.09     | 128.83    | 0.02                        | 0.33                         | 0.069      |
| 335             | Thr            | 8.15     | 106.46    | -0.04                       | -0.2                         | 0.057      |
| 336             | Asp            | 9.39     | 119.33    | -0.04                       | -0.05                        | 0.041      |
| 337             | Gly            | 8.61     | 108.52    | 0                           | 0                            | 0.000      |
| 339             | Cys            | 8.44     | 117.17    | -0.02                       | -0.04                        | 0.022      |
| 340             | Lys            | 9.04     | 121.45    | -0.02                       | -0.03                        | 0.021      |
| 341             | Val            | 8.62     | 129.67    | -0.01                       | 0.08                         | 0.019      |
| 343             | Ala            | 7.73     | 128.49    | -0.01                       | -0.02                        | 0.011      |
| 344             | Gln            | 8.65     | 115.81    | -0.03                       | -0.13                        | 0.040      |
| 345             | Met            | 8.85     | 116.3     | 0.06                        | 0.19                         | 0.071      |
| 346             | Ala            | 9.34     | 123.03    | -0.02                       | -0.01                        | 0.020      |
| 347             | Val            | 9.37     | 116.61    | -0.11                       | 0.52                         | 0.151      |

|     |     |      |        |       |       |       |
|-----|-----|------|--------|-------|-------|-------|
| 352 | Leu | 8.24 | 119.02 | -0.03 | -0.29 | 0.065 |
| 355 | Val | 7.67 | 116.01 | -0.03 | 0.21  | 0.052 |
| 356 | Gly | 8.6  | 107.35 | -0.03 | 0.08  | 0.034 |
| 359 | Ile | 8.62 | 127.21 | -0.05 | 0.04  | 0.051 |
| 360 | Thr | 7.23 | 115.35 | -0.03 | 0.02  | 0.030 |
| 361 | Ala | 8.3  | 129.67 | -0.03 | 0.05  | 0.032 |
| 362 | Asn | 8.6  | 115.13 | -0.01 | -0.11 | 0.024 |
| 364 | Val | 8.04 | 124.26 | -0.04 | 0.06  | 0.042 |
| 365 | Ile | 8.55 | 127.08 | -0.04 | -0.05 | 0.041 |
| 366 | Thr | 8.39 | 116.64 | 0     | -0.09 | 0.018 |
| 367 | Glu | 7.72 | 120.12 | -0.05 | -0.03 | 0.050 |
| 368 | Ser | 8.58 | 114.76 | -0.01 | 0.03  | 0.012 |
| 369 | Thr | 7.18 | 112.31 | -0.04 | 0.08  | 0.043 |
| 370 | Glu | 8.8  | 122.19 | 0.04  | 0.32  | 0.075 |
| 371 | Asn | 8.08 | 116.98 | 0.03  | -0.24 | 0.057 |
| 372 | Ser | 8.72 | 116.14 | 0.02  | 0.16  | 0.038 |
| 377 | Glu | 8.38 | 121.17 | 0.62  | 1.96  | 0.734 |
| 378 | Leu | 9.27 | 126.87 | 0.01  | -0.21 | 0.043 |
| 379 | Asp | 9.2  | 122.15 | -0.04 | 0.08  | 0.043 |
| 382 | Phe | 8.31 | 117.7  | -0.02 | -0.08 | 0.026 |
| 383 | Gly | 8.9  | 111.03 | 0     | 0.11  | 0.022 |
| 384 | Asp | 8.95 | 125.66 | -0.05 | -0.17 | 0.060 |
| 385 | Ser | 9.09 | 116.57 | 0     | -0.09 | 0.018 |
| 386 | Tyr | 9.23 | 114.83 | -0.04 | -0.16 | 0.051 |
| 387 | Ile | 9.3  | 123.75 | -0.01 | 0     | 0.010 |
| 388 | Val | 8.98 | 127.27 | 0     | 0.02  | 0.004 |
| 389 | Ile | 8.88 | 128.82 | 0     | 0.1   | 0.020 |
| 390 | Gly | 8.48 | 112.68 | -0.04 | -0.18 | 0.054 |
| 391 | Val | 8.39 | 112.2  | -0.03 | -0.02 | 0.030 |
| 392 | Gly | 8.81 | 111.06 | -0.03 | -0.11 | 0.037 |
| 393 | Glu | 8.98 | 122.36 | -0.02 | -0.08 | 0.026 |
| 394 | Lys | 8    | 116.04 | 0     | 0.1   | 0.020 |
| 395 | Lys | 7.19 | 120.4  | -0.02 | -0.04 | 0.022 |
| 396 | Ile | 9    | 118.38 | -0.02 | -0.12 | 0.031 |
| 397 | Thr | 8.46 | 111.7  | -0.01 | -0.21 | 0.043 |
| 400 | Trp | 9.19 | 129.52 | 0.01  | 0.24  | 0.049 |

|     |     |      |        |       |       |       |
|-----|-----|------|--------|-------|-------|-------|
| 401 | His | 6.44 | 123.45 | -0.01 | -0.06 | 0.016 |
| 402 | Arg | 8.16 | 127.72 | 0     | 0.01  | 0.002 |
| 403 | Ser | 9.18 | 125.11 | -0.06 | -0.07 | 0.062 |
| 404 | Gly | 8.56 | 110.16 | -0.01 | 0.01  | 0.010 |
| 405 | Ser | 8.11 | 114.77 | -0.01 | 0.03  | 0.012 |
| 406 | Thr | 8.22 | 115.85 | -0.02 | 0.14  | 0.034 |
| 407 | Ile | 8.07 | 122.87 | -0.01 | 0     | 0.010 |
| 408 | Gly | 8.47 | 113.01 | -0.02 | 0.55  | 0.112 |
